# Supplementary material
Source: PubMed Central journal article supplement (PMC2763184)
Supplement: NIHMS16191-supplement-01.pdf [file NIHMS16191-supplement-01.pdf]

**Supplemental Figure 1.** Low energy MS/MS spectra obtained via CID of electrospray-generated carboxylate anion [M-H or D]<sup>-</sup> from the LC peak of a HDHA as follows: A) mono-hydroxy docosahexaenoic acids: 20-HDHA, 17-HDHA, 16-HDHA, 14-HDHA, 13-HDHA, 11-HDHA, 10-HDHA, 8-HDHA, 7-HDHA, or 4-HDHA; B) O,O-d<sub>2</sub>-mono-hydroxy docosahexaenoic acids: d<sub>2</sub>-20-HDHA, d<sub>2</sub>-17-HDHA, d<sub>2</sub>-16-HDHA, d<sub>2</sub>-14-HDHA, d<sub>2</sub>-13-HDHA, d<sub>2</sub>-11-HDHA, d<sub>2</sub>-10-HDHA, d<sub>2</sub>-8-HDHA, d<sub>2</sub>-7-HDHA, or d<sub>2</sub>-4-HDHA. Each inset depicts the structure and CID fragmentation.
